# Supplementary material for: Compound Heterozygous FKTN Variants in a Patient with Dilated Cardiomyopathy Led to an Aberrant α-Dystroglycan Pattern
Source: MDPI journal article supplement (doi:10.3390/ijms23126685), 2022-06-15
Supplement: s1 [file s1]

Table S1: Genotype of the index patient (III.3) analysed with panel sequencing. Only variants with a minor allele frequency < 0.0005 in GnomAD [1] are shown. As *SNTA1* is only listed with Long QT syndrome in the Online Mendelian Inheritance in Man database (<https://www.ncbi.nlm.nih.gov/omim>) the cosegregation of this variant within the family was not analyzed.

| gene         | reference sequence | variant                              |
|--------------|--------------------|--------------------------------------|
| <i>FKTN</i>  | NM_006731.2        | c.895A>C, p.Ser299Arg, rs367662190   |
| <i>FKTN</i>  | NM_006731.2        | c.1325A>G, p.Asn442Ser, rs1429464723 |
| <i>SNTA1</i> | NM_003098.2        | c.356A>G, p.Lys119Arg, rs n.a.       |

1. Karczewski, K.J.; Francioli, L.C.; Tiao, G.; Cummings, B.B.; Alfoldi, J.; Wang, Q.; Collins, R.L.; Laricchia, K.M.; Ganna, A.; Birnbaum, D.P.; et al. The mutational constraint spectrum quantified from variation in 141,456 humans. *Nature* **2020**, *581*, 434-443, doi:10.1038/s41586-020-2308-7.
